# Supplementary material for: Evaluation of Disease Causality of Rare Ixodes ricinus-Borne Infections in Europe
Source: Pathogens. 2020 Feb 24;9(2):150. doi: 10.3390/pathogens9020150 (PMC7168666; doi:10.3390/pathogens9020150)
Supplement: Supplementary file 1 [file pathogens-09-00150-s001.xlsx]

## Sheet: S1_search criteria
Search history sorted by search number ascending
Database	#	Searches	Results*
Ovid MEDLINE(R) and Epub Ahead of Print, In-Process & Other Non-Indexed Citations, and Daily <1946 to July 25, 2018>	1	anaplasmosis/ or anaplasma/ or "Anaplasma phagocytophilum"/ or Babesiosis/ or babesia/ or Borrelia/ or Rickettsia/ or (Anaplasma or "Ehrlichia phagocytophilum" or Babesia or "Borrelia miyamotoi" or "b. miyamotoi" or Neoehrlich* or "c.n. mikurensis" or schotti-variant or "erhlichia walkeri" or "Rickettsia helvetica" or "Rickettsia monacensis" or "R. helvetica" or "R. monacensis" or Anaplasmosis or…	14118
	2	(exp animals/ not humans/) or (equine or cattle or bovine or canine or mice or mouse or rat or rats or guinea-pig* or dog).ti.	4711295
	3	1 not 2	5890
	4	limit 3 to yr="2008 -Current"	2482
Embase Classic+Embase <1947 to 2018 July 25>	1	anaplasmosis/ or "human granulocytic anaplasmosis"/ or anaplasma/ or anaplasma phagocytophilum/ or piroplasmosis/ or babesia/ or babesia divergens/ or babesia microti/ or rickettsia/ or rickettsia helvetica/ or rickettsia monacensis/ or Borrelia/	14853
	2	(Anaplasma or "Ehrlichia phagocytophilum" or Babesia or "Borrelia miyamotoi" or "b. miyamotoi" or Neoehrlich* or "c.n. mikurensis" or schotti-variant or "erhlichia walkeri" or "Rickettsia helvetica" or "Rickettsia monacensis" or "R. helvetica" or "R. monacensis" or Anaplasmosis or Babesiosis).ti,ab,kw.	9591
	3	1 or 2	17424
	4	((exp experimental organism/ or animal tissue/ or animal cell/ or exp animal disease/ or exp carnivore disease/ or exp bird/ or exp experimental animal welfare/ or exp animal husbandry/ or animal behavior/ or exp animal cell culture/ or exp mammalian disease/ or exp mammal/ or exp marine species/ or nonhuman/ or animal.hw.) not human/) or (equine or cattle or bovine or canine or mice or mouse or …	7059742
	5	3 not 4	7001
	6	limit 5 to (conference abstract or conference paper or "conference review")	1041
	7	5 not 6	5960
	8	limit 7 to yr="2008 -Current"	2211
	9	(canadian or elsevier or embase).cr.	25490641
	10	8 and 9	1874
*Before de-duplication

## Sheet: S2_A. phagocytophilum
Diagnosis	Year	PMID	Country	Immunnocompromised	Underlying health condition	Underlying treatment	Sex	Age	History of tick bite	Exposure/risk	Time since TB	EM	Fever	RF	Weight loss	Headache	Skin manifestation	Weakness/lethargy/malaise	Anemia	Lymphadenopathy	Myalgia	Joint pain (arthralgia)	Chills	Rigors	Others	Hospitalization	ESR	PCT	CRP	LDH	Erytro	Leuco	Bilirubin	Thromb	Liver (ASAT/ALAT/ᵧGT/AP)	Kidney (GFR/Creat/MDRD)	Treatment	Recovery after treatment	Real-time PCR/PCR	Serology/Immunology	Sequencing	Others	Excluded causes	Borrelia	Other infec	Other plausible causes	Co-infection	Tissue tested	Chronic
A. phagocytophilum	2008	18536621	Greece	n			F	9	Yes		weeks		y	38												Yes	+		+						+		doxycycline and ceftriaxone	Yes	16S rRNA	Negative IFA	16S rRNA 98%		PCR and serology: cytomegalovirus, herpes-simplex virus 1, Epstein-Bar virus, varizella-zoster virus, parvovirus, and adenovirus, also blood culture and the urine microscopy and culture were negative. IFA and PCR: Brucella, Rickettsia conorii, Rickettsia typhi, Coxiella burnetii, Borrelia burgdorferi, Bartonella henselae, and Bartonella quintana.					Whole blood, serum
A. spp	2009	18848483	Cyprus	n	Kawasaki disease	IVIG	F	1					y				rash			y					conjunctivitis, erythematosus oropharynx, abdominal distention and diarrhea	Yes	+		+				+		+		KD tr+cefuroxime IV then piperacillin/tazobactam and vancomycin; later, metronidazole was also added.	Yes	16S rRNA	Negative IgG, positive IgM	16S rRNA 100%		PCR and IFA: cytomegalovirus (CMV), Epstein–Barr virus (EBV), enterovirus, adenovirus, parvovirus and mycoplasma were all negative, as was blood culture. Antibodies and PCR against Coxiella burnetii phase II, Rickettsia conorii and Rickettsia typhi. Clostridium in stool.		y	KD		Blood
A. phagocytophilum	2009	20584160	Greece	n			M	53	No				38			y		y		y						Yes				+					-	+	doxycycline and ciprofloxacin and two patients were treated with doxycycline and amoxicillin/clavulanate. One patient's clinical condition did not improve and ciprofloxacin was replaced by chloramphenicol on day three of treatment.	Yes	16S rRNA	Positive IgM	16S rRNA 98%
A. phagocytophilum	2009	20584160	Greece	n			M	56	No				39.5			y		n		n						Yes				+		-			-	+	doxycycline and ciprofloxacin and two patients were treated with doxycycline and amoxicillin/clavulanate. One patient's clinical condition did not improve and ciprofloxacin was replaced by chloramphenicol on day three of treatment.	Yes	16S rRNA	Positive IgM	16S rRNA 98%
A. phagocytophilum	2009	20584160	Greece	n			F	17	No				40			n		y		n					Splenomegaly, Abdominal pain, nausea, constipation	Yes			+	+					-	+	doxycycline and ciprofloxacin and two patients were treated with doxycycline and amoxicillin/clavulanate. One patient's clinical condition did not improve and ciprofloxacin was replaced by chloramphenicol on day three of treatment.	Yes	16S rRNA	Positive IgM	16S rRNA 98%
A. phagocytophilum	2009	20584160	Greece	n			M	69	No				38.5			n	Maculopapular rash	n		n				y	rigor	Yes			+	+						-	doxycycline and ciprofloxacin and two patients were treated with doxycycline and amoxicillin/clavulanate. One patient's clinical condition did not improve and ciprofloxacin was replaced by chloramphenicol on day three of treatment.	Yes	16S rRNA	Positive IgM	16S rRNA 98%
A. phagocytophilum	2009	20584160	Greece	n			M	62	No				39.6			n	Maculopapular rash	n		n				y	rigor, Splenomegaly	Yes			+	+		-			-	+	doxycycline and ciprofloxacin and two patients were treated with doxycycline and amoxicillin/clavulanate. One patient's clinical condition did not improve and ciprofloxacin was replaced by chloramphenicol on day three of treatment.	Yes	16S rRNA	Positive IgM	16S rRNA 98%
A. phagocytophilum	2009	20584160	Greece	n			M	17	No				40			n	Maculopapular rash	n		n						Yes			+	+						+	doxycycline and ciprofloxacin and two patients were treated with doxycycline and amoxicillin/clavulanate. One patient's clinical condition did not improve and ciprofloxacin was replaced by chloramphenicol on day three of treatment.	Yes	16S rRNA	Positive IgM	16S rRNA 98%
A. phagocytophilum	2009	19416290	Slovenia	n			M	63		Yes	2 weeks		40			y		y		n	y	y				Yes		+	+			-		-			doxycycline	Yes	16S rRNA	Positive IgG			PCR, serology Ehrlichia chaffeensis, B. burgdorferi s.l. and TBE	y			B. garinii was isolated from CSF	CSF, blood
A. phagocytophilum	2009	19456807	Cyprus	n			F	27		Yes			39.5						y	y					hepatosplenomegaly	Yes	+		+					-	+		doxycycline, ceftriaxone, imipenem-cilastatin	Yes	16S rRNA	IFA	16S rRNA 100% homology with Anaplasma sp.		Negative blood cultures, antibody tests against CMV, EBV, hepatitis, HIV, mycoplasma, coxackievirus, adenovirus and parvovirus
A. phagocytophilum	2009	A 42-year-old man with persistent fever after holiday	Germany	n			M	42		Yes			38.6			y					y					Yes			+			-			+		doxycycline	Yes		positive serology			Borrelia, coxiella, lepto, abv, bartonella, influenza, cmv, hepatitis, toxoplasma, toxocara					Blood
A. phagocytophilum	2010	20036281	Austria	n	Lyme borreliosis 3 years earlier and a sinistral carpal-tunnel-syndrome	local antiphlogistics and opioid analgesics.	F	73	Yes		6 months		n												pain in the left hand, right arm, tumescence and restricted mobility.	Yes			+						+		ceftriaxone, after confirmation of HGA doxycycline	Yes	groESL, 16S rRNA	IFA				y		positive for IgG antibodies against Varicella-Zoster virus (VZV), Cytomegalovirus (CMV), Epstein–Barr virus (EBV), and borderline values were detected for IgG antibodies against Tick–borne encephalitis virus (TBEV). CSF was positive for IgG antibodies against CMV and EBV. IgG against Borrelia burgdorferi sensu lato (s.l.) were detected by enzyme immunoassay and immunoblotting in serum and CSF.		CSF, blood
A. phagocytophilum	2010	20036281	Austria	y	chronic lymphatic leukemia (CLL, Rai-Stage IV)	chemotherapy	M	67	No				y	39											spastic paraplegia, anesthesia and analgesia of lower limbs and a paraparesis of upper extremities (strength III–IV).	Yes			+	+	-	-					penicillin, ceftriaxone, and imipenem, concomitantly to chemotherapy, was initiated. Moreover, anti-edematous therapy with mannite and dexamethasone was employed.	Death	groESL, 16S rRNA	negative (?)				y		IgG antibodies against Herpes simplex virus (HSV), CMV, EBV, VZV and TBEV tested positive in serum and CSF. Borderline values were measured for B. burgdorferi s.l. IgG in serum and for B. burgdorferi s.l. IgM in CSF. CSF analysis revealed pleocytosis, high total protein and lactate, and low glucose levels.		CSF, blood
A. phagocytophilum	2010	20684497	Slovakia	n	Had flue like symptoms (arth,mialg, headache, 37 fever) after tick bite one year before		M	54	Yes		1 year		n			y					y	y			acute diarrhoea	Yes											none	recovered with no treatment	16S rRNA	Negative IFA	16S rRNA 99%	Blood smear	PCR Borrelia burgdorferi sensu lato	?			borderline Borrelia serology	Blood
A. phagocytophilum	2010	20300926	Austria	n			M	64	Yes		4 weeks		39				morbilliform erythema									Yes			+	+			+	-	+	+	none	recovered with no treatment	negative	IFA			Meningococcal disease, Serum antibodies were determined for Rickettsia conorii, CMV, Parvo Virus and EBV on the day of administration. DNA tests for Ehrlichia phagocytophilium and Borrelia sp. were also run.	y			Borrelia IgM antibodies (IB) and IgG antibodies
Anaplasma	2012	22841007	Slovenia	n	Cesarean		F	36	No	Blood transfusion			37.8													Yes			+		-	+		-	+		doxycycline	Yes	16S rRNA, groesl	IFA seroconversion	groesl	Blood smear, bone marrow
A. phagocytophilum	2012	22321996	France	n			na	46		Yes			39.5			y		y		y	n	n	y		chills, sweats, nausea/vomiting/abdominal pain, cough	Yes			+	+		-		-	+		doxycycline	Yes	msp2/p44	IFA		Blood smear	Borrelia sp., Treponema sp., Leptospira sp., Mycoplasma sp., and Chlamydia sp., Rickettsia sp., Wolbachia sp., A. marginale, and A. platys					Blood
A. phagocytophilum	2012	22321996	France	n			M	47		Yes			40			y		y		y	y	y	y		chills, sweats, nausea/vomiting/abdominal pain,	Yes			+	+		-		-	+		doxycycline	Yes	msp2/p44	IFA		Blood smear	Borrelia sp., Treponema sp., Leptospira sp., Mycoplasma sp., and Chlamydia sp., Rickettsia sp., Wolbachia sp., A. marginale, and A. platys					Blood
A. phagocytophilum	2012	22321996	France	n			F	67	Yes		10 days		39.5			y		y		y	y	y				Yes			+	+		-		-	+		doxycycline	Yes	msp2/p44	IFA		Blood smear	Borrelia sp., Treponema sp., Leptospira sp., Mycoplasma sp., and Chlamydia sp., Rickettsia sp., Wolbachia sp., A. marginale, and A. platys					Blood
A. phagocytophilum	2013	23577610	Czech Republic	n	tinnitus (feeling of metalloid sound), aseptic meningitis (diagnosed at admission)		M	43		Yes			n			y		y							neck stiffness, increased sweating, transient tingling around the upper and lower lips on the left side and left upper arm	Yes								-	+		doxycycline	Yes	na	IFA			Borrelia, enterovirus sp., human simplex virus 1 and 2, cytomegalovirus, varicella zoster virus, Epstein–Barr virus, John Cunningham virus, human herpes virus 6 or toxoplasma, serology: TBE, borrelia, leptospirosis					Blood, CSF
A. phagocytophilum	2014	24857681	Germany	n			M	40	Yes		3 days		39			y		y			y					No				+							doxycycline	Yes	negative	IFA			Babesia spp., Borrelia spp., and Rickettsia spp.					Blood, bite sites were swabbed with a sterile cotton bud
A. phagocytophilum	2014	25566398	Belgium	n			M	60		Yes	1 week		40.5			y					y	y	y		chills	Yes			+	+		-		-	+		ceftriaxone, minocycline	Yes	msp2, groEL, 16S rRNA	IFA	msp2, groEL , 16S rRNA 100%	negative blood smear	Blood and CSF samples were negative for antibodies to Borrelia spp. Serologies for hantaviruses, Epstein–Barr virus, cytomegalovirus, parvovirus and leptospires were also negative.					Blood, CSF
A. phagocytophilum	2014	25535572	Italy	n			F	14		Yes			41			y			y		y	y			meningismus, drowsiness	Yes	+		+			-		-	+		ceftriaxone	Yes		IFA		WB-MRI on a 1.5 T MRI scanner	Serology: hepatitis viruses A-B-C, Epstein-Barr virus, cytomegalovirus, sterile culture					Blood
A. phagocytophilum	2015	26403105	Poland	n			M	42	Yes		10 days	y					Erythematous changes in the right lower leg	y			y				swallen ankle in Erythrematous leg	Yes						+			+		ceftriaxon, amoxicillin	Yes	groESL		groESL 100%		Borrelia seology					Blood
A. phagocytophilum	2015	25073813	Spain	n	Membranous glomerulonephritis, nephrotic sydrome		F	43		Yes			39			y		y			y					Yes	+		+			-		-		+	Ciprofloxacin	Yes	negative	IgG		negative blood smear	PCR and b. culture Rickettsia spp. Serology Coxiella burnetii, Borrelia burgdorferi, A. phagocytophilum y Rickettsia
A. phagocytophilum	2015	25073813	Spain	n			M	33		Yes			39.6			y										Yes			+			-			+		doxycycline	Yes	negative	positive serology		negative blood smear	hepatitis A, B y C, VIH, VEB, CMV, sífilis, Mycoplasma pneumoniae, Chlamydia pneumoniae, Brucella sp., C. burnetii, B. burgdorferi sensu lato, Bartonella henselae y R. conorii
A. phagocytophilum	2016	26778486	Austria	n			F	52	Yes		1 week		39					y				y				No			+			-		-	+		doxycycline	Yes	16s rRNA, groEL	ELISA	16s rRNA, groEL 100%		Borrelia burgdorferi sensu lato IgG and IgM , IgG and IgM against Rickettsia conorii and PCR: B. burgdorferi sl, Rickettsia spp., and Babesia spp.					Blood
A. phagocytophilum	2016	26866855	Slovenia	n			M	14	Yes		1 month		39.7			y	discrete maculopapular rash		y				y		Chills, neck and lumbar pain, passing of dark urine, jaundice	Yes			+	+			+	-	+		doxycycline	Yes	16s rRNA, groEsL	IFA	16s rRNA, groEsL	Blood smear	hantavirus infection (serology), Leptospira, E. chaffeensis, TBE					Blood
A. phagocytophilum	2016	Beyond Lyme: Tick-borne ittness in Europe	Belgium	n			M	26	Yes		2.5 weeks		y			y		y			y					na											doxycycline	Yes		lgM (with a negative lgG assay)								Blood
A. phagocytophilum	2017	28189511	Greece	n			M	57		Yes			Y												sore throat, irritability and insomnia.	Yes			+			+	+	-	+	+	broad-spectrum antibiotics (meropenem and doxycycline based on the possibility of an infection due to a rickettsial-like organism). Then Acyclovir and oseltamivir were added	Death	groEL		groEL 99.2%	Blood smear	Herpes Simplex virus-2, Human Immunodeficiency virus-1, Hepatitis B or C viruses, Brucella melitensis, Leptospira spp., Chlamydophila psittacii or Chlamydophila pneumoniae, Mycoplasma pneumoniae, Legionella pneumophila, or Rickettsia spp, E. canis, multiple negative blood culture sets, a negative SeptiFast test, and serological evidence of past Cytomegalovirus, Epstein-Barr virus and Herpes Simpl…		y	Coxiella burnetii IgM titers were borderline positive, with negative IgG titers. positive HSV-1 PCR from the peripheral blood and a positive influenza RT-PCR from bronchial secretions.		Blood
A. phagocytophilum	2017	28526564	Austria	n			M	38	Yes		9 days		y			y		y			y	y				No			+								doxycycline	Yes	16s rRNA, groEsL		16s rRNA (100%)	The PCR/ESI-MS
A. phagocytophilum	2017	29173891	Norway	n			M	60		Yes			y			y			y		y					Yes			+					-		+	doxycycline	Yes		IFA seroconversion		bone marrow smear			y	antibodies against brucella and coxiella
[truncated: 2 more columns]

## Sheet: S3_B. divergens
Diagnosis	Year	PMID	Country	Immunnocompromised	Underlying health condition	Underlying treatment	Sex	Age	History of tick bite	Exposure/risk	Time since TB	EM	Fever	RF	Weight loss	Headache	Skin manifestation	Weakness/lethargy/malaise	Anemia	Lymphadenopathy	Myalgia	Joint pain (arthralgia)	Dark urine (haemoglobinuria)	Abdominal complaints	Jaundice	Others	Hospitalization	ESR	PCT	CRP	LDH	Erytro	Leuco	Bilirubin	Thromb	Liver (ASAT/ALAT/ᵧGT/AP)	Kidney(GFR/Creat/MDRD)	Treatment	Recovery after treatment	Real-time PCR/PCR	Serology/Immunology	Sequencing	Others	Excluded causes	Borrelia	Other infec	Other plausible causes	Co-infection	Tissue tested
B. vivergens	2010	19664008	Ireland	y	splenectomy		M	87	Yes				39.1						y							Discoloured urine,disseminated intravascular coagulation, acute kidney injury and severe lactic acidosis	Yes							+	-			intravenous quinine 600 mg t.d.s. and clindamycin	Death				Blood smear
B. divergens	2010	20587183	Finland	n	Severe alcohol-induced pancreatitis (in 1993), subsequent type 1 diabetes mellitus, Staphylococcus aureus septicemia (in 2000), and atherosclerosis.		M	53	Yes			y	y				erythema chronicum migrans (ECM) and dark streaks	y	y				y			back pain, reported that his urine was darker and lower in volume than usual for several days.	Yes			+	+			+	-	+		intravenous quinine , clindamycin, cefotaxime	Death	18S rDNA		18S rDNA 100%	Blood smear	HIV	y	y	pulmonary aspergillosis (infection with Aspergillus fumigatus), S. epidermidis in blood cultures, and Candida albicans cultured from the tip of his dialysis catheter.		EDTA blood
B. divergens	2010	Babesiosis-an unusual cause of acute confusion in an elderly man	Ireland	y	Splenectomy		M	87		Yes																Confusion, shock with renal and hepatic failure	Yes						+						Death				Blood smear
B. divergens	2011	21192869	France	n			F	37	Yes		2 weeks		38.5			y					y	y				chills	No			+			-				+	doxycycline	Yes	18S rDNA	negative IFA	18S rDNA 100%	Positive blood smear, negative culture	Serologic results for Lyme disease, tick-borne encephalitis virus, tularemia, Anaplasma spp., Coxiella burnetii, and Rickettsia spp., as well as blood cultures were negative.					Blood
B. divergens	2011	21192869	France	n			M	35	Yes		2 weeks		39			y					y	y					Yes			+			-		-	+		azithromycin on day 1 then 250 mg/day plus atovaquone	Yes		negative IFA		Positive blood smear, negative culture						Blood
B. divergens	2014	24656155	Spain	n			M	46		Yes			y						y				y	y	y	severe abdominal pain, jaundice, and black and red deposits in his urine.	Yes				+			+	-		+	atovaquone/proguanil and azithromycin	Yes	18S rRNA	IFA	18S rRNA 100%	Blood smear	Hepatitis; HIV; and Bartonella, Brucella, Leishmania, Leptospira, and Borrelia spp. and of blood cultures were negative.					Blood
B. divergens	2015	25686807	Spain	y	HIV, splenectomy	antiretroviral therapy	M	37		Yes																acute respiratory distress syndrome	Yes											quinine, clindamycin, later changed to azithromycin and atovaquone for lower toxicity.	Yes	18S rRNA gene	WB, ELISA, IFA	18S rRNA gene 100%	Blood smear
B. divergens	2015	25541295	Norway	y	splenectomy		M	58		Yes			y				petechiae		y					y	y	chills, macroscopic haematuria, and abdominal and back pain, jaundice	Yes			+	+			+	-		+	clindamycin, quinine and tid, and erythrocyte exchange apheresis	Yes		IFA		Blood smear	IFA other babesia sp.					Blood
B. divergens	2015	26232090	Turkey	y	splenectomy		F	28		Yes			37.8					y	y						y	jaundice, and general impairment	Yes				+		+	+	-	+	+	quinine + clindamycin and an exchange transfusion (ET)	Yes	18S rRNA		18S rRNA 100%	Blood smear	Hepatitis, HIV, brucella, malaria					Blood
B. divergens	2017	28286145	Ireland	y	Autosplenectomy (hyposplenism) , celiac		M	79	Yes		2 weeks		38.2					y					y	y		nausea, generalized pains and dark-colored urine	Yes				+		+	+	-	+	+	atovaquone and azithromycin , followed by quinineplus clindamycin. Ceftriaxone to cover the possibility of Borrelia burgdorferi co-infection.	Yes	18S rRNA	IFA	18S rRNA 100%		Blood cultures and tracheal aspirates were sterile.					Blood
B. divergens	2018	29496491	Spain	y			F	87		Yes			y					y					y	y	y	jaundice, and general impairment	Yes			+				+	-	+	+	azithromycin 500 mg/d plus atovaquone/proguanil 750/300 mg/12 h	Death	18S rRNA	IFA	18S rRNA 100%	Blood smear	hepatitis A, B and C, HIV, Leptospira, Borrelia, Bartonella and Rickettsia conorii					Blood
[truncated: 2 more columns]

## Sheet: S4_B. microti
Diagnosis	Year	PMID	Country	Immunnocompromised	Underlying health condition	Underlying treatment	Sex	Age	History of tick bite	Exposure/risk	Time since TB	EM	Fever	RF	Weight loss	Headache	Skin manifestation	Weakness/lethargy/malaise	Anemia	Lymphadenopathy	Myalgia	Joint pain (arthralgia)	Dark urine (haemoglobinuria)	abdominal complaints	chills	Others	Hospitalization	ESR	PCT	CRP	LDH	Erytro	Leuco	Bilirubin	Thromb	Liver(ASAT/ALAT/ᵧGT/AP)	Kidney (GFR/Creat/MDRD)	Treatment	Recovery after treatment	Real-time PCR/PCR	Serology/Immunology	Sequencing	Others	Excluded causes	Borrelia	Other infec	Other plausible causes	Co-infection	Tissue tested
B. microti	2010	21050324	Austria	n			M	63		Yes			y													tachypnoea , pallor	Yes			+	+				-	+		Antiparasitic treatment with intravenous quinine in combination with clindamycin, then azithromycin-atovaquone	Yes	18S rRNA		18S rRNA 100%	Blood smear	H1N1 influenza, Plasmodium, B. divergens					Blood
B. microti	2013	23849287	Denmark	n			F	64		Yes			39.6				erythematous skin changes							y	y	bilateral knee pain, chills, abdominal pain and vomiting, nightly sweats, dizziness, lower back pain.	Yes			+	+		-		-	+		atovaquone + azithromycine , proguanil	Yes	18S rRNA	IFA	18S rRNA	Blood smear	Negative blood culture, negative hepatitis A serologicl test, negative HIV test, Cytomegalovirus (previous inf.), P. falciparum malaria					Blood
B. microti	2013	23432953	France	n			M	82		Yes			y					y							y	chills	No			+	+		-	+	-	+		clindamycin and quinine	Yes	18S rRNA, LDH			Blood smear	Sterile cultures, PCR: Plasmodium falciparum, Babesia divergens, Borrelia burgdorferi serology					Blood
B. microti	2015	26525187	France	n			F	68	Yes		1 month		38.8			y		y						y		dyspnea, and vomiting	Yes			+				+	-	+		clindamycin, quinine then tovaquone and azithromycin. Then amoxicillin	Yes	18S rRNA		18S rRNA 100%	Blood smear	Plasmodium	y			Borrelia serology IgG and IgM	Blood, CSF
B. microti	2016	27294655	Poland	n			F	48		Yes			39.5			y									y	chills, facial nerve palsy and stiffness of the neck	Yes		+	+					-	+		atovaquone/proquanil, continued with doxycycline, azithromycin and clindamycin , then ceftriaxone for NB	Yes	18S rRNA		18S rRNA 100%	Blood smear	sterile blood culture, plasmodium, B. EU1, B. divergens	y		NB	Borrelia serology, probably B. garinii	Blood, CSF
B. microti	2016	27560451	Spain	n			M	35		Yes			38			y		y									Yes											atovaquone/proguanil and azithromycin	Yes	18S rRNA	Borderline IFA	18S rRNA 100%		Anaplasma phagocytophilum, B. divergens					Blood
B. microti	2016	27499182	Spain	n			F	66		Yes			y					y						y	y	chills, nausea, vomiting and mild abdominal pain, vascular, respiratory, and renal failures	Yes				+			+	-	+	+	atovaquone and azithromycin, one RBC exchange procedure	Yes	18S rRNA		na	Blood smear						Blood
[truncated: 4 more columns]

## Sheet: S5_B. venatorum
Diagnosis	Year	PMID	Country	Immunnocompromised	Underlying health condition	Underlying treatment	Sex	Age	History of tick bite	Exposure/risk	Time since TB	EM	Fever	RF	Weight loss	Headache	Skin manifestation	Weakness/lethargy/malaise	Anemia	Lymphadenopathy	Myalgia	Joint pain (arthralgia)	Dark urine (haemoglobinuria)	Others	Hospitalization	ESR	PCT	CRP	LDH	Erytro	Leuco	Bilirubin	Thromb	Liver(ASAT/ALAT/ᵧGT/AP	Kidney(GFR/Creat/MDRD)	Treatment	Recovery after treatment	Real-time PCR/PCR	Serology/Immunology	Sequencing	Others	Excluded causes	Borrelia	Other infec	Other plausible causes	Co-infection	Tissue tested	Chronic	Notes
Babesia EU1	2008	18270666	Germany	y	Splenectomy, B cell lymphoma	Rituximab	M	63		y									y				y	subicterus, dark urine											?	clindamycin and quinine Seroconversion after 8 months	Yes	yes	Negative	y									hemolytic anemia
Babesia EU1/venatorum	2011	21878956	Austria	y	Hemolytic anemia, T-cell large granular lymphocyte leukemia, splenectomy	prednisolone, methotrexate	M	68					y						y					renal failure	Yes				+			+			+	quinine and clindamycin	Yes	yes	IFA	yes	Blood smear	Serology of Borrelia burgdorferi, Rickettsia spp., early summer meningitis-encephalitis, and ehrlichiosis.					Blood		anemia hemoglobin of 7.2 mg/dl
B. venatorum	2018	29285582	Sweden	y	splenectomized, T cell large granular lymphocytic leukemia (T-LGL), cyclic neutropenia, idiopathic trombocytopenic purpura, hypogammaglobulinemia, bouts of hemolytic anemia	Treatment with rituximab 2 years earlier.	M	52					y						y		y		y	dark urine, rigors				+	+			+	+		+	quinine and clindamycin, azithromycine and atovaquone	Yes	yes		y	white blood cell smear
[truncated: 1 more columns]

## Sheet: S6_B. miyamotoi
Diagnosis	Year	PMID	Country	Immunnocompromised	Underlying health condition	Underlying treatment	Sex	Age	History of tick bite	Exposure/risk	Time since TB	EM	Fever	RF	Weight loss	Headache	Skin manifestation	Weakness/lethargy/malaise	Anemia	Lymphadenopathy	Myalgia	Joint pain (arthralgia)	Dark urine (haemoglobinuria)	Neurological complaints	abdominal complaints	Others	Hospitalization	ESR	PCT	CRP	LDH	Erytro	Leuco	Bilirubin	Thromb	Liver(GFR/Creat/MDRD)	Kidney(ASAT/ALAT/ᵧGT/AP	Treatment	Recovery after treatment	Real-time PCR/PCR	Serology/Immunology	Sequencing	Others	Excluded causes	Borrelia	Other infec	Other plausible causes	Co-infection	Tissue tested
B. miyamotoi	2013	23953389	Netherlands	y	stage 4 diffuse large B cell lymphoma, un explained chronic diarrhoea, splenectomy, chronic meningitis	CHOP (cyclophosphamide, doxorubicin, vincristine, and prednisolone), poly chemotherapy, and rituximab	M	70	Yes															y		slow cognitive processing, memory deficits, and a disturbed gait,	Yes											ceftriaxone	Yes	16S rDNA	Negative serology	glpQ	motile spirochaetes in CSF (dark-field microscopy)	Sterile cultures, HSV, VZV, CMV, EBV, enterovirus, JC virus, and parechovirus, Tropheryma whipplei, Borrelia burgdorferi senso lato, Rickettsia helvetica, Anaplasma phagocytophilum, Neoehrlichia mikurensis, and Babesia spp.					Blood, CSF
B. miyamotoi	2016	27533748	Germany	y	non-Hodgkin lymphoma	rituximab maintenance therapy	F	74	Yes		4 weeks					y								y	y	dizziness, vomiting, slight neck stiffness	na											ceftriaxone	Yes	16S rRNA, flaB, and 6 housekeeping genes		16S rRNA, flaB, and 6 housekeeping genes 100%	CSF microscopy	Viral meningitis (CSF), Serum and CSF negative for B. burgdorferi (PCR, serology)					Blood, CSF
B. miyamotoi	2018	30124426	Netherlands	n	history included cervical carcinoma and breast cancer, curatively treated		F	72	Yes				y		y	y	erythematous lesion			y	y	y					no			y			y		y			no	yes	negative	seroconversion anti-GlpQ and anti–variable major proteins (Vmps) IgM and IgG			Borrelia burgdorferi sensu lato and syphilis
[truncated: 3 more columns]

## Sheet: S7_N. mikurensis
Diagnosis	Year	PMID	Country	Immunnocompromised	Underlying health condition	Underlying treatment	Sex	Age	History of tick bite	Exposure/risk	Time since TB	EM	Fever	RF	Weight loss	Headache	Skin manifestation	Weakness/lethargy/malaise	Anemia	Lymphadenopathy	Myalgia	Joint pain (arthralgia)	Dark urine (haemoglobinuria)	Anemia	Chills	Abdominal complaints	Edema	Others	Hospitalization	ESR	PCT	CRP	LDH	Erytro	Leuco	Bilirubin	Thromb	Liver(ASAT/ALAT/ᵧGT/AP	Kidney(GFR/Creat/MDRD)	Treatment	Recovery after treatment	Real-time PCR/PCR	Serology/Immunology	Sequencing	Others	Excluded causes	Borrelia	Other infec	Other plausible causes
CNM	2010	20587186	Switzerland	n	Coronary artery bypass graft surgery and mitral valve reconstruction for which prosthetic material was used.		M	61		Yes			39.5					y							y			chills, and moderate dyspnea	Yes			+			+					Antimicrobial drug treatment for endocarditis with prosthetic material, consisting of vancomycin, gentamicin, and rifampin, then switched to doxycycline	Yes	16S rRNA		16S rRNA , groEL 98%	Negative blood culture	Brucella spp., Chlamydia trachomatis, Chlamydia pneumoniae, and Borrelia burgdorferi were negative. Species-specific PCRs for A. phagocytophilum, Tropheryma whipplei, B. henselae, B. quintana, Legionella spp., and L. pneumophila were negative.		y	Enzyme immunoassays (EIAs) were positive for immunoglobulin (Ig) G antibodies reactive to Bartonella henselae (512) and B. quintana (1,024), Coxiella burnetii (phase II IgG titer 160), Rickettsia rickettsii/conorii (IgG 256), and Rickettsia typhi (IgG 128), Mycoplasma pneumoniae (index 2.7). IgM was positive only for A. phagocytophilum (512, atypical fluorescence pattern), presenting a low titer …
CNM	2010	20519481	Germany	y	Suspected chronic inflammatory demyelinating polyneuropathy.	Cyclophosphamide, prednisolone, rituximab	M	69	Yes	Yes	2 years		y	39												y		night sweats, nonproductive cough, left thoracic pain, and intermittent bouts of diarrhea	Yes			+		-	-					doxycycline (1 × 200 mg/day)	Yes	16S rDNA, groEL		16S rDNA, groEL 100%/98.7%		cultures of blood, HIV-1 or -2, hepatitis B or C virus, cytomegalovirus, Anaplasma phagocytophilum, Borrelia burgdorferi, Bordetella pertussis, Brucella abortus/melitensis, Chlamydia psittaci, Coxiella burnetii, Ehrlichia chaffeensis, Francisella tularensis, Legionella pneumophila, Leptospira interrogans, Mycoplasma pneumoniae, Treponema pallidum, or Toxoplasma gondii, The serum levels of fungal …			whereas antibodies against Herpes simplex virus, Varicella-zoster virus, Epstein-Barr virus, Parvovirus B19, Bartonella henselae, B. quintana, Chlamydia pneumoniae, and C. trachomatis were present at low levels with little or no IgM measurable.
CNM	2010	20519481	Germany	n	intracerebral and subarachnoid hemorrhage with an aneurysm of the left arteria carotis interna was diagnosed		M	57					38.8																Yes			+			?		-	+		piperacillin-tazobactam then ciprofloxacin and fosfomycin were added	Death	16S rRNA		16S rDNA 100%		sterile cultures,		y	oxacillin-sensitive Staphylococcus aureus in the tracheal secretion
CNM	2010	20220155	Sweden	y	B-cell chronic lymphocytic leukemia, autoimmune anemia, splenectomy	corticosteroids, cyclophosphamide	M	77					y	39.5			erysipelas-like rash							y	y	y		1.acute diarrhea, chills and a short episode of loss of consciousness 2. anemia	Yes		+	+			+					doxycycline	Yes	16S rRNA		16S rRNA 100%		sterile cultures
CNM	2011	21353949	Czech Republic	y	Advanced-stage mantle cell lymphoma, splenectomy	chemotherapy (rituximab), anti-CD20 treatment	F	55					39				erythema nodosum, erythematous ankles and knees				y	y					y	edema	Yes			+			+		-			doxycycline, with continuation of corticosteroid treatment	Yes	16S rRNA, 18S rRNA		16S rRNA 100%	TEM	Blood cultures, urine culture, and pharyngeal swabs were performed with negative results. Panfungal detection was negative
CNM	2011	21353949	Czech Republic	y	posttransplant lymfoproliferative disorder (PTLD), splenectomy	Tacrolimus monotherapy, rituximab	M	58	Yes		weeks		38				erythema on arms and legs: migratory, multiple, oval, sharply demarcated, red to bluish skin lesions.	y				y					y	edema	Yes			+			+					doxycycline	Yes	16S rRNA, 18S rRNA		16S rRNA 100%	TEM	panfungal detection was negative
CNM	2014	24647019	Sweden	y	asplenic,		M	75					y																yes											doxycycline		16S rRNA gene		16S rRNA gene
CNM	2014	24647019	Sweden	y	asplenic,		F	67					y																Yes											doxycycline		16S rRNA gene		16S rRNA gene
CNM	2014	24647019	Sweden	y	asplenic,		F	67					y																Yes											doxycycline		16S rRNA gene		16S rRNA gene
CNM	2014	24647019	Sweden	y			M	54					y																Yes											doxycycline		16S rRNA gene		16S rRNA gene
CNM	2014	24647019	Sweden	y	asplenic,		M	59					y																No											doxycycline		16S rRNA gene		16S rRNA gene
CNM	2015	25416710	Sweden	y	mammary cancer	Rituximab	F	71	Yes		months		y		y													tachhycardia	Yes			+						+		doxycycline	Yes	16S rRNA, groEL				serology for Borrelia , Rickettsia and for Anaplasma
CNM	2015	26197035	Sweden	n			F	68	Yes		2 months	y					rash (EM) on her right breast												No											phenoxymethylpenicillin	Yes	groEL, 16S rRNA gene		16S rRNA gene		pre-existing IgG against A. phagocytophilum that remained unchanged,	y		IgM against Borrelia outer surface protein C and pre-existing Borrelia-specific IgG titers that increased during the study
CNM	2015	26197035	Sweden	n	allergy, LB 8 years before	aspirin	F	57	Yes		1.5 months	y					rash (EM) on her left breast												No											phenoxymethylpenicillin	Yes	groEL, 16S rRNA gene		16S rRNA gene		Borrelia,		y	borderline levels of IgG against A. phagocytophilum on day 0, which increased successively on days 65 and 98
[truncated: 5 more columns]

## Sheet: S8_R. helvetica
Diagnosis	Year	PMID	Country	Immunnocompromised	Underlying health condition	Underlying treatment	Sex	Age	History of tick bite	Exposure/risk	Time since TB	EM	Fever	RF	Weight loss	Headache	Skin manifestation	Weakness/lethargy/malaise	Anemia	Lymphadenopathy	Myalgia	Joint pain (arthralgia)	Dark urine (haemoglobinuria)	Photophobia	Others	Hospitalization	ESR	PCT	CRP	LDH	Erytro	Leuco	Bilirubin	Thromb	Liver(ASAT/ALAT/ᵧGT/AP)	Kidney(GFR/Creat/MDRD)	Treatment	Recovery after treatment	Real-time PCR/PCR	Serology/Immunology	Sequencing	Others	Excluded causes	Borrelia	Other infec	Other plausible causes	Co-infection	Tissue tested	Chronic
R. helvetica	2009	18649945	Sweden	n			M	57		Yes			39.2			y	macular rash				y	y		y	photophobia	Yes	+		+			+		+	+	+	doxycycline + steroids	Yes	17-kDa and Omp B	MIF, WB IgG	17-kDa and Omp B 100%		Blood cultures were negative. Antibodies against Borrelia burgdorferi (serum and cerebrospinal fluid (CSF)), Anaplasma phagocytophilum, Q-fever, HIV 1 + 2, EBV, CMV, herpes simplex virus 1 and 2 (serum and PCR of cerebrospinal fluid), nephropathia epidemica					CSF, blood
R. helvetica	2010	20202426	Sweden	n	Subacute meningitis		F	56	No				y			y										Yes			+			+		-			doxycycline	Yes	16S rRNA, ompB, 17kDa		16S rRNA, ompB, 17kDa 100%	Positive culture from CSF	Negative blood and CSF cultures for i herpesviruses, tick-borne encephalitis, and enteroviruses. Urine negative Legionella and pneumococcal antigens, and serum negative for antibodies against Borrelia burgdorferi, Mycoplasma pneumoniae or Coxiella burnetii.					CSF, blood
R. helvetica	2011	22567472	Sweden	n	Meningoencephalitis		F	23		Yes			38.5			y								y	tiff neck, and photophobia	Yes											cefotaxime, ampicillin, valacyclovir, and betamethasone then doxycycline	Yes	17-kDa, ompB and gltA	3	17-kDa, ompB , gltA 99-100%	Positive culture	Blood and CSF bacterial cultures, as well as tests for Borrelia and enteroviruses, were all negative.		y	y	PCR for HSV-2 in the CSF was positive. HSV-2 IgM in the serum was weakly positive, and HSV-2 IgG was positive in both serum and CSF with a ratio around 20.	Blood, CSF
[truncated: 2 more columns]

## Sheet: S9_R. monacensis
Diagnosis	Year	PMID	Country	Immunnocompromised	Underlying health condition	Underlying treatment	Sex	Age	History of tick bite	Exposure/risk	Time since TB	EM	Fever	RF	Weight loss	Headache	Skin manifestation	Weakness/lethargy/malaise	Anemia	Lymphadenopathy	Myalgia	Joint pain (arthralgia)	Dark urine (haemoglobinuria)	Others	Hospitalization	ESR	PCT	CRP	LDH	Erytro	Leuco	Bilirubin	Thromb	Liver(GFR/Creat/MDRD)	Kidney(ASAT/ALAT/ᵧGT/AP	Treatment	Recovery after treatment	Real-time PCR/PCR	Serology/Immunology	Sequencing	Others	Excluded causes	Borrelia	Other infec	Other plausible causes	Co-infection	Tissue tested	Chronic	Notes
R. monacensis	2007	18252123	Spain	n			M	84		Yes			39.5			y	nonpruritic, disseminated maculopapular rash, with no inoculation eschar					y			No											doxycycline (100 mg/12 h for 10 d)	Yes	ompA, glta	Cross reacting pos. IFA (5 rickettsias: R. monacensis, R. conorii, R. helvetica, R. akari, and R. australis)	ompA, glta 100%	culture (shell vial)	By pcr not serology: R. conorii, R. helvetica, R. akari, and R. australis)					Blood and culture (from blood)
R. monacensis	2007	18252123	Spain	n			F	59	Yes		1 week	y	38			y	erythematous rash, with no inoculation eschar, at the site of a tick bite								No											doxycycline (100 mg/12 h for 10 d)	Yes	ompA, glta	Cross reacting pos. IFA (5 rickettsias: R. monacensis, R. conorii, R. helvetica, R. akari, and R. australis)	ompA, glta 100%		By pcr not serology: R. conorii, R. helvetica, R. akari, and R. australis)					Blood
R. monacensis	2012	22469314	Italy	n			M	28	Yes				38.2			y	edema and erythema with inoculation eschar								Yes	+					+	+				doxycycline	Yes	gltA, ompA	IFA	ompA 100%		R. conorii, Anaplasma phagocytophilum, Bartonella henselae, Ehrlichia chaffeensis, and Coxiella burnetii					Blood, skin sample taken from the inoculation eschar		hypocromic and microcytic anemia
R. monacensis	2013	24326096	Croatia	n				8	No			y					EM								No											azithromycin	Yes	16S rRNA		16S rRNA 100%			y			B. afzelii (biopsy, serology and PCR)	Blood, EM skin biopsy		In the current case, the patient did not seem to suffer any symptoms associated with a Rickettsia spp. infection. The erythematous lesions were attributed to the B. burgdorferi s.l. infection and the patient recovered completely after a five-day course of antibiotics.
[truncated: 1 more columns]
